# Supplementary material for: RNA-seq based transcriptomic map reveals new insights into mouse salivary gland development and maturation
Source: PubMed Central journal article supplement (PMC5112738; doi:10.1186/s12864-016-3228-7), 2016-11-16
Supplement: 12864_2016_3228_MOESM2_ESM.pdf [file 12864_2016_3228_MOESM2_ESM.pdf]

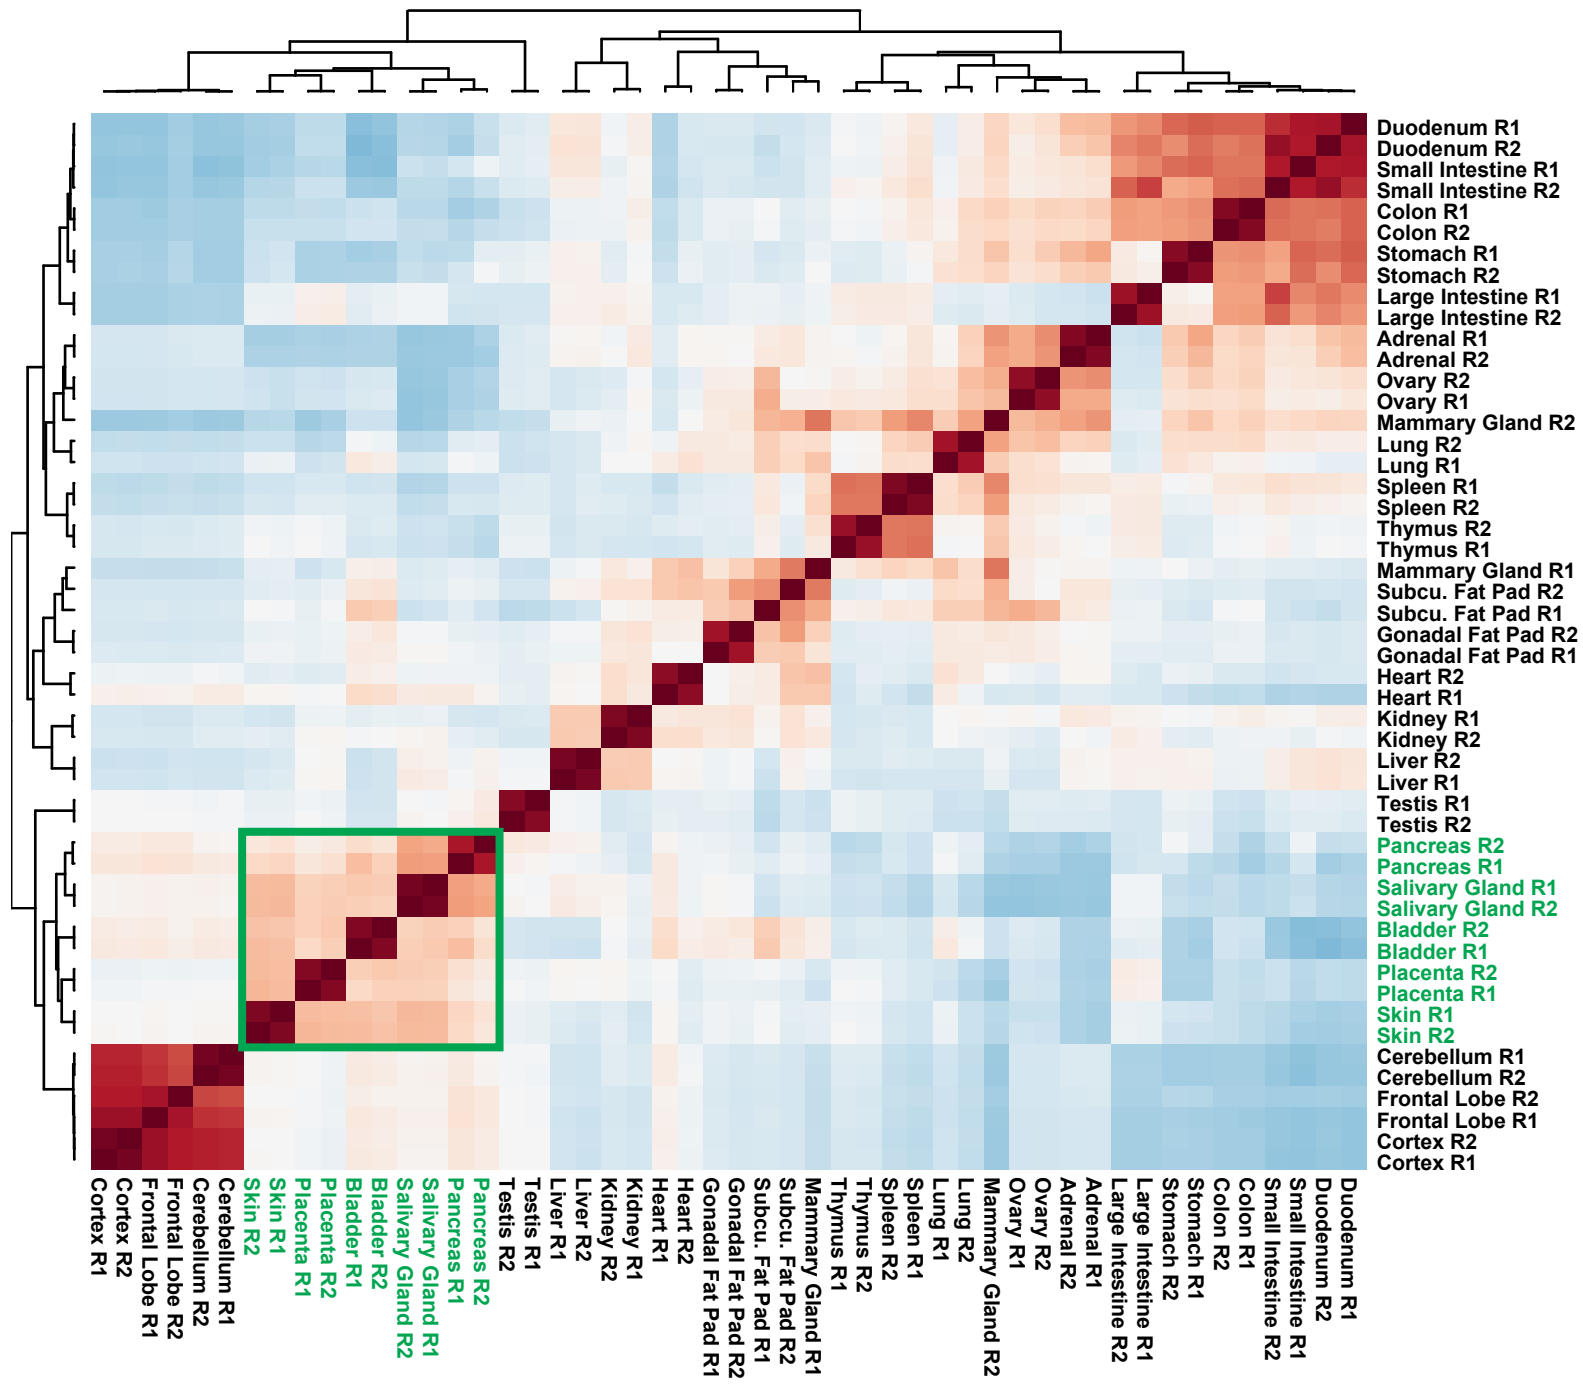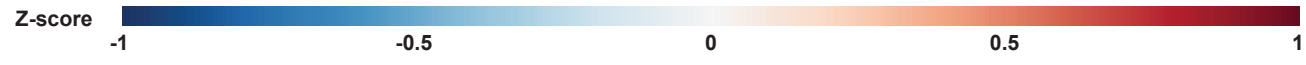

- Duodenum R1
- Duodenum R2
- Small Intestine R1
- Small Intestine R2
- Colon R1
- Colon R2
- Stomach R1
- Stomach R2
- Large Intestine R1
- Large Intestine R2
- Adrenal R1
- Adrenal R2
- Ovary R2
- Ovary R1
- Mammary Gland R2
- Lung R2
- Lung R1
- Spleen R1
- Spleen R2
- Thymus R2
- Thymus R1
- Mammary Gland R1
- Subcu. Fat Pad R2
- Subcu. Fat Pad R1
- Gonadal Fat Pad R2
- Gonadal Fat Pad R1
- Heart R2
- Heart R1
- Kidney R1
- Kidney R2
- Liver R2
- Liver R1
- Testis R1
- Testis R2
- Pancreas R2
- Pancreas R1
- Salivary Gland R1
- Salivary Gland R2
- Bladder R2
- Bladder R1
- Placenta R2
- Placenta R1
- Skin R1
- Skin R2
- Cerebellum R1
- Cerebellum R2
- Frontal Lobe R2
- Frontal Lobe R1
- Cortex R2
- Cortex R1

- Duodenum R1
- Duodenum R2
- Small Intestine R1
- Small Intestine R2
- Colon R1
- Colon R2
- Stomach R1
- Stomach R2
- Large Intestine R1
- Large Intestine R2
- Adrenal R1
- Adrenal R2
- Ovary R2
- Ovary R1
- Mammary Gland R2
- Lung R2
- Lung R1
- Spleen R1
- Spleen R2
- Thymus R2
- Thymus R1
- Mammary Gland R1
- Subcu. Fat Pad R1
- Subcu. Fat Pad R2
- Gonadal Fat Pad R1
- Gonadal Fat Pad R2
- Heart R2
- Heart R1
- Kidney R1
- Kidney R2
- Liver R2
- Liver R1
- Testis R1
- Testis R2
- Pancreas R2
- Pancreas R1
- Salivary Gland R1
- Salivary Gland R2
- Bladder R2
- Bladder R1
- Placenta R2
- Placenta R1
- Skin R1
- Skin R2
- Cerebellum R1
- Cerebellum R2
- Frontal Lobe R2
- Frontal Lobe R1
- Cortex R2
- Cortex R1
